# Supplementary material
Source: PubMed Central journal article supplement (PMC7486226)
Supplement: NIHMS1622476-supplement-Supporting_information.pdf [file NIHMS1622476-supplement-Supporting_information.pdf]

# SUPPORTING INFORMATION

## Discovery of First-in-class Protein Arginine Methyltransferase 5 (PRMT5) Degraders

Yudao Shen,<sup>†,#</sup> Guozhen Gao,<sup>§,#</sup> Xufen Yu,<sup>†</sup> Huensuk Kim,<sup>†</sup> Li Wang,<sup>‡</sup> Ling Xie,<sup>‡</sup> Megan Schwarz,<sup>†</sup> Xian Chen,<sup>‡</sup> Ernesto Guccione,<sup>†</sup> Jing Liu,<sup>†,\*</sup> Mark T. Bedford,<sup>§,\*</sup> and Jian Jin<sup>†,\*</sup>

<sup>†</sup>Mount Sinai Center for Therapeutics Discovery, Departments of Pharmacological Sciences and Oncological Sciences, Tisch Cancer Institute, Icahn School of Medicine at Mount Sinai, New York, NY 10029, United States

<sup>§</sup>Department of Epigenetics and Molecular Carcinogenesis, The University of Texas MD Anderson Cancer Center, Smithville, TX 78957, United States

<sup>‡</sup>Department of Biochemistry and Biophysics, University of North Carolina at Chapel Hill, Chapel Hill, North Carolina 27599, United States

### Table of contents

|    |                                                                 |     |
|----|-----------------------------------------------------------------|-----|
| 1. | Figure S1. <sup>1</sup> H NMR spectrum of compound <b>15</b> .  | S3  |
| 2. | Figure S2. <sup>13</sup> C NMR spectrum of compound <b>15</b> . | S4  |
| 3. | Figure S3. HPLC spectrum of compound <b>15</b> .                | S5  |
| 4. | Figure S4. <sup>1</sup> H NMR spectrum of compound <b>17</b> .  | S6  |
| 5. | Figure S5. <sup>13</sup> C NMR spectrum of compound <b>17</b> . | S7  |
| 6. | Figure S6. HPLC spectrum of compound <b>17</b> .                | S8  |
| 7. | Figure S7. <sup>1</sup> H NMR spectrum of compound <b>21</b> .  | S9  |
| 8. | Figure S8. <sup>13</sup> C NMR spectrum of compound <b>21</b> . | S10 |
| 9. | Figure S9. HPLC spectrum of compound <b>21</b> .                | S11 |

10. Table S1. Raw data of compounds **15**, **21**, **17** and EPZ015666 inhibiting the PRMT5 methyltransferase activity in the PRMT5 biochemical assay. S12

11. Table S2. Raw data of compounds **15**, **21**, **17** and EPZ015666 in cell viability assays. S13

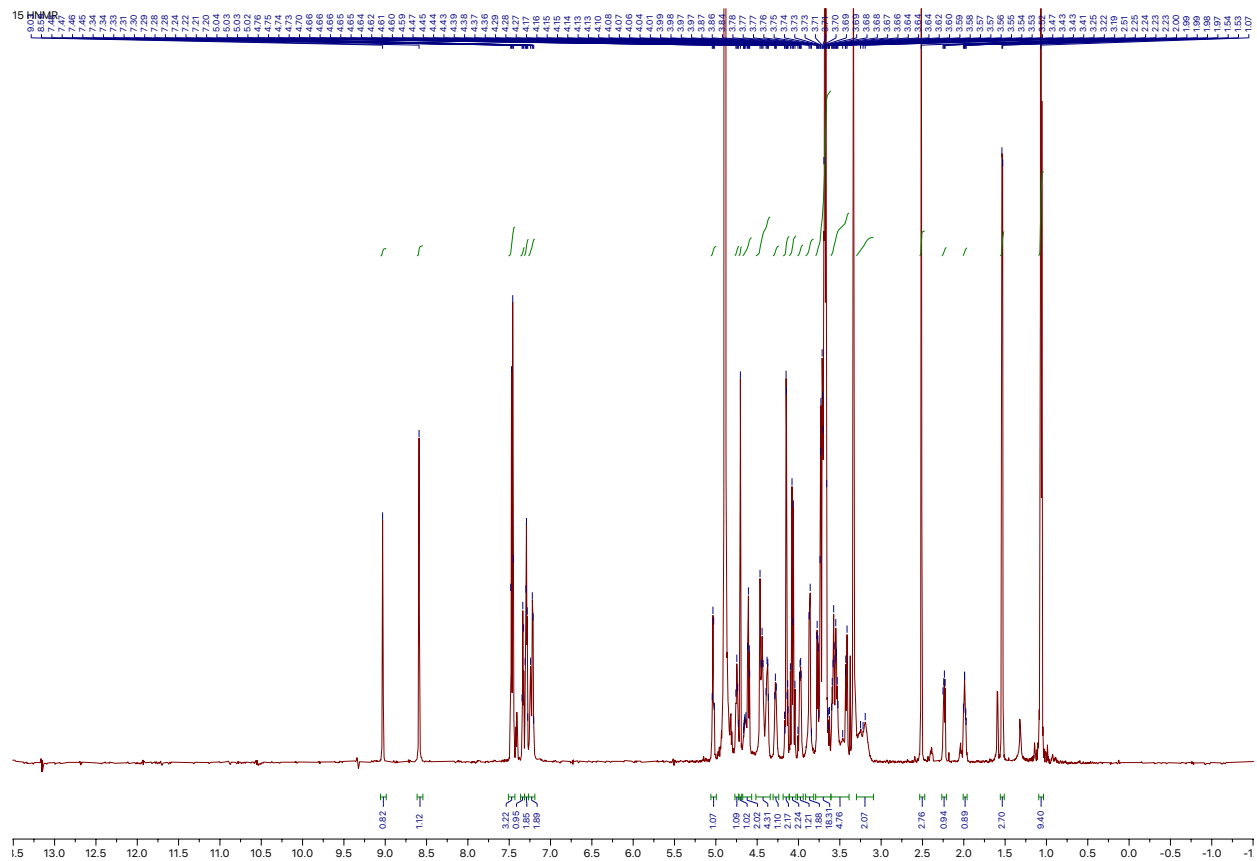

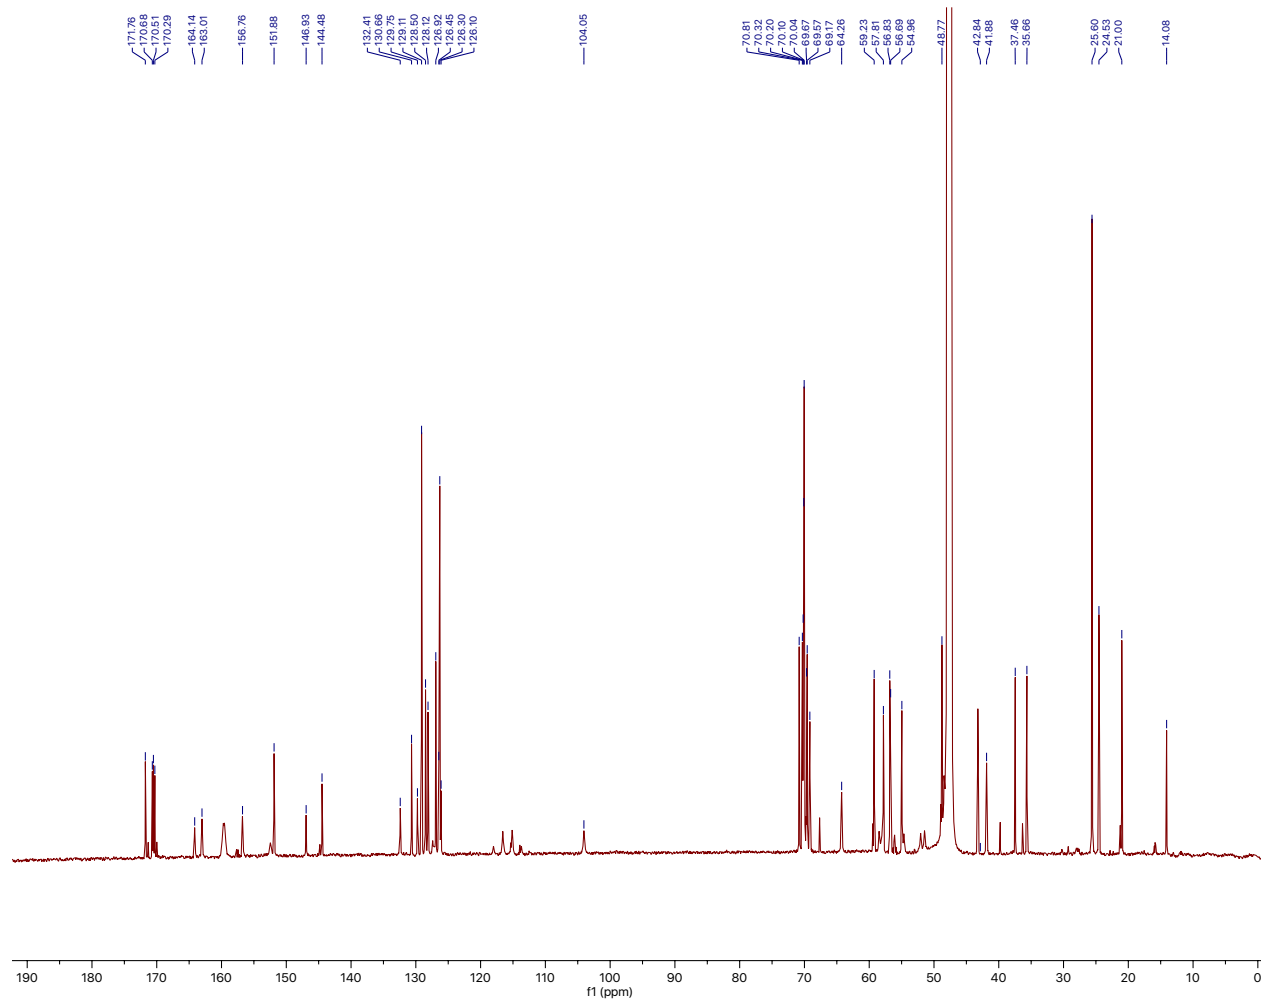

Figure S2.  $^{13}\text{C}$  NMR spectrum of compound **15**,  $\text{CD}_3\text{OD}$ .

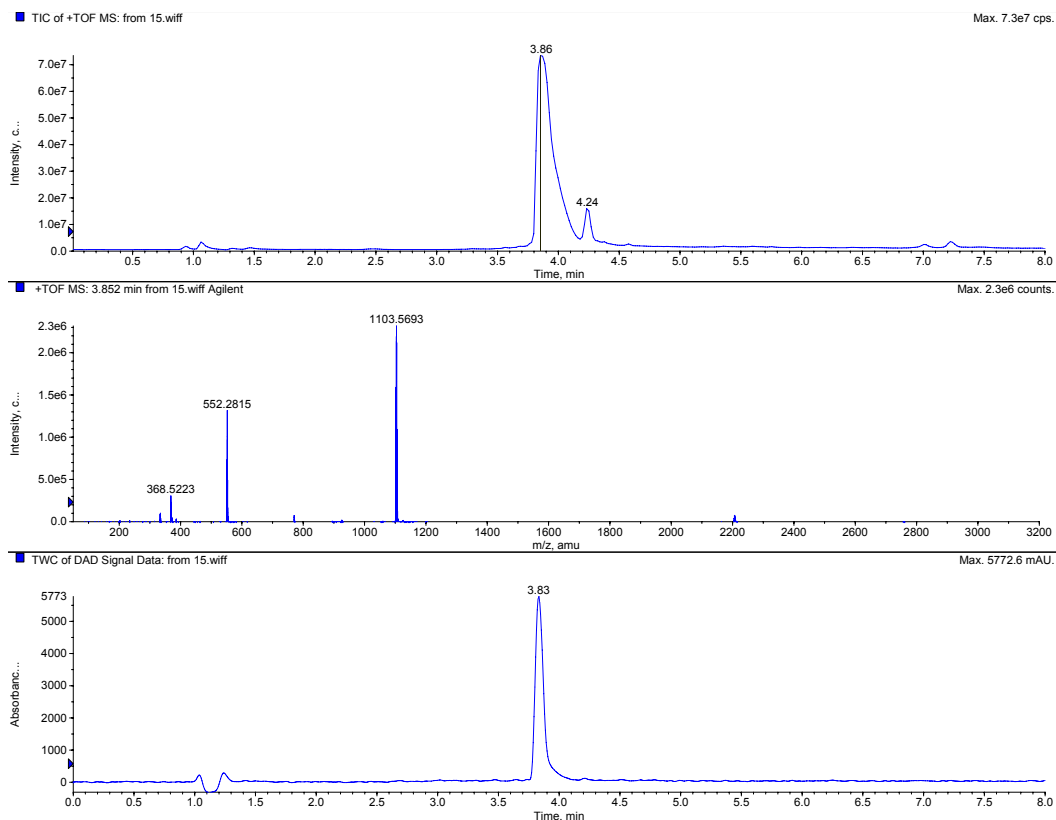

Figure S3. HPLC spectrum of compound 15.

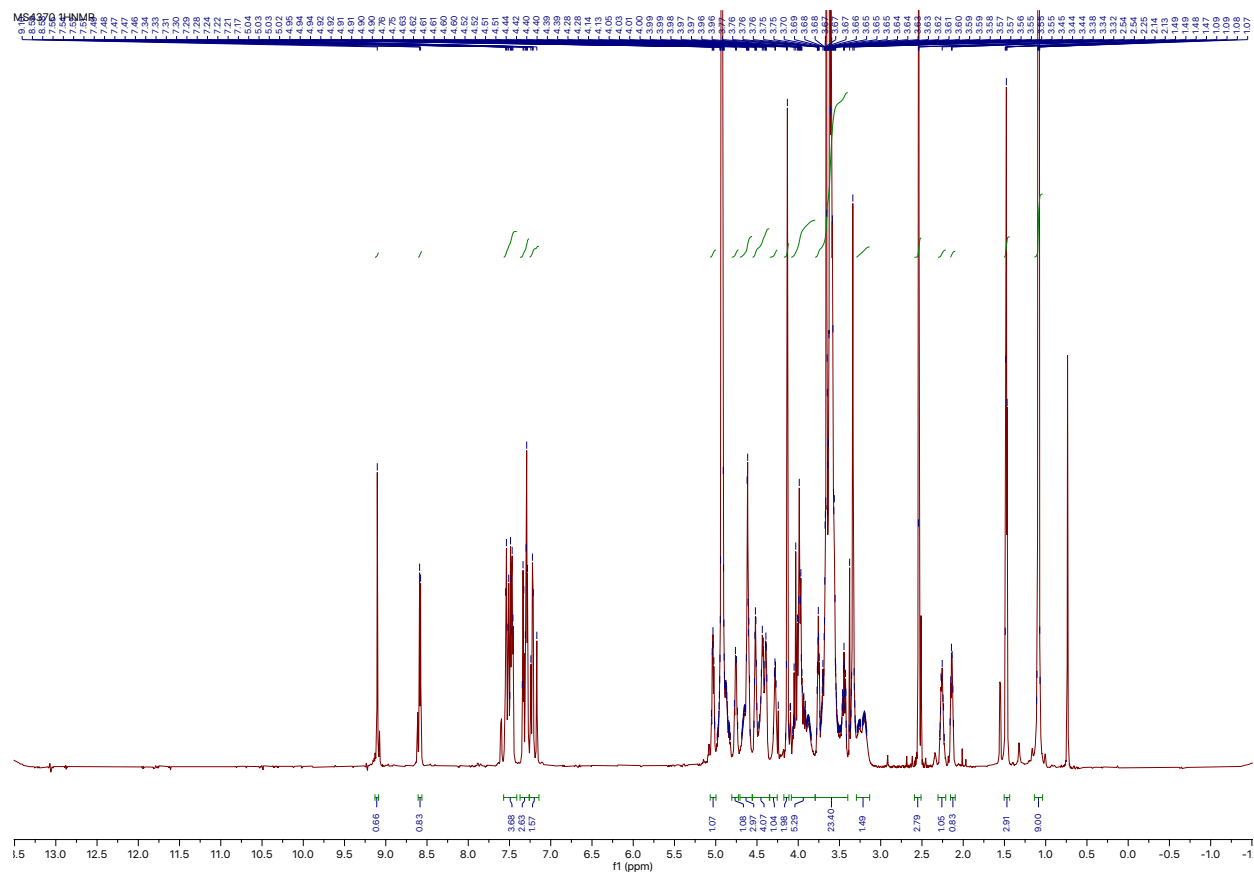

Figure S4. <sup>1</sup>H NMR spectrum of compound **17**, CD<sub>3</sub>OD.

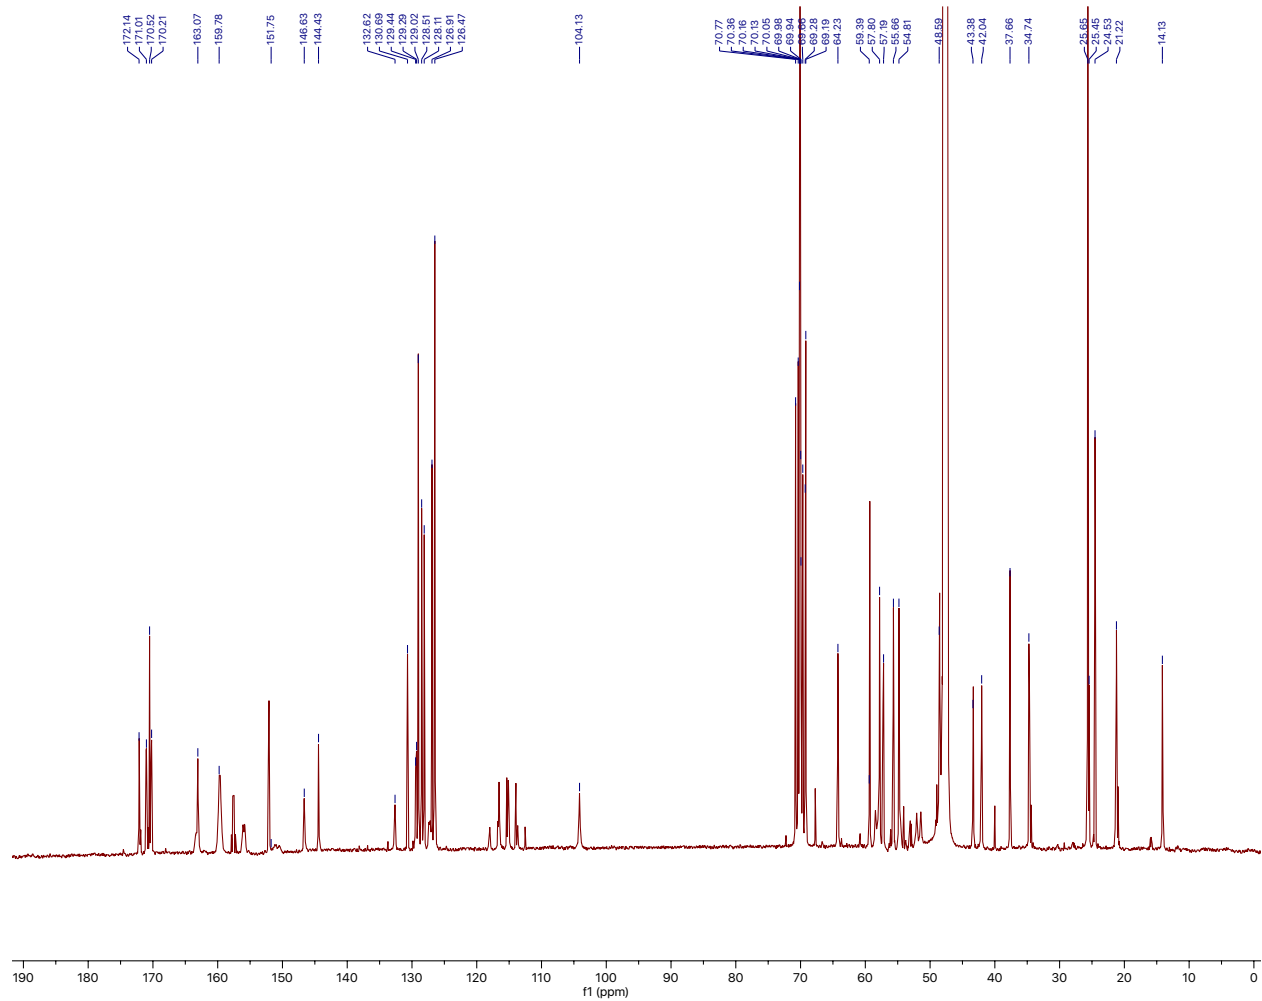

Figure S5.  $^{13}\text{C}$  NMR spectrum of compound **17**,  $\text{CD}_3\text{OD}$ .

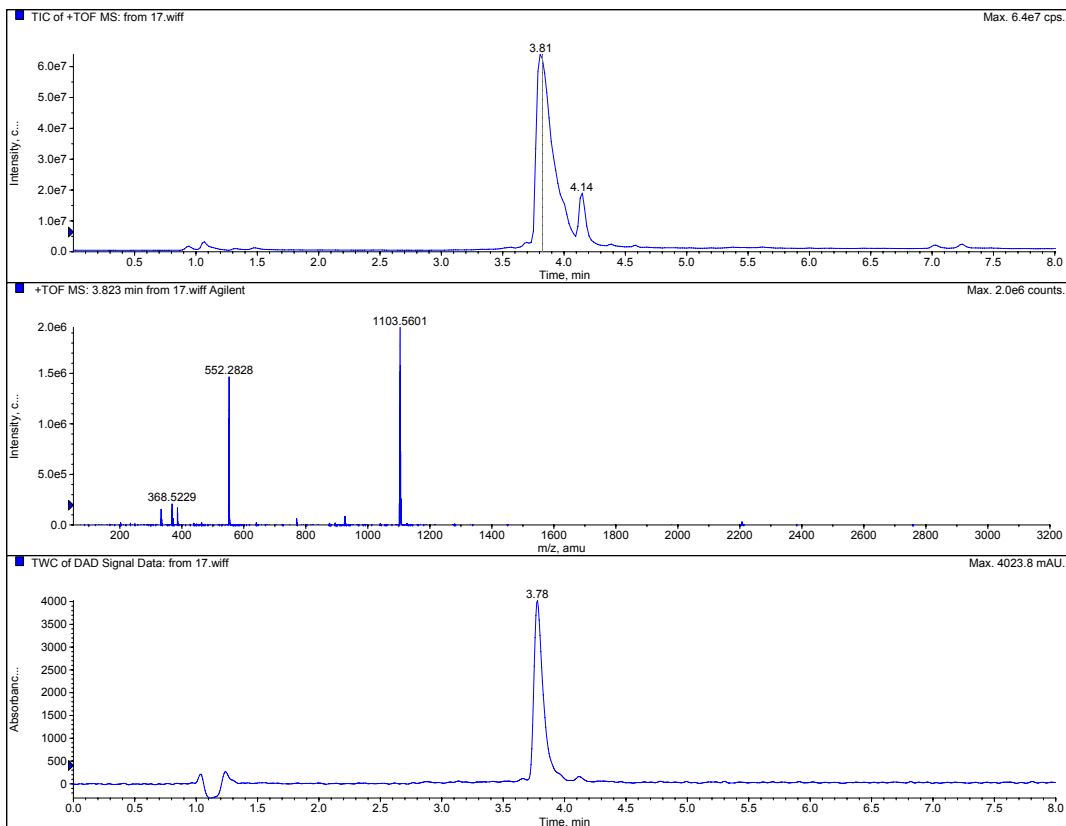

Figure S6. HPLC spectrum of compound 17.



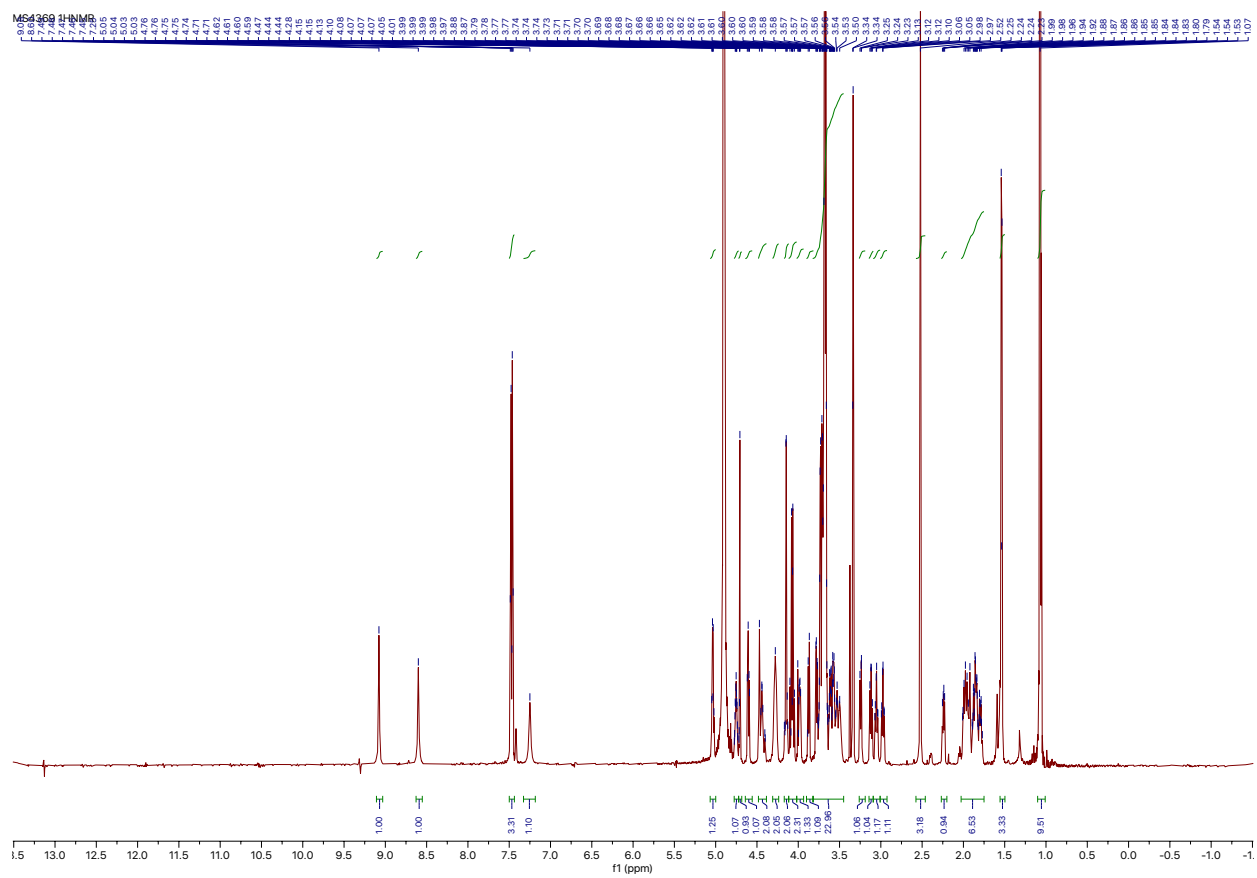

Figure S7.  $^1\text{H}$  NMR spectrum of compound **21**,  $\text{CD}_3\text{OD}$

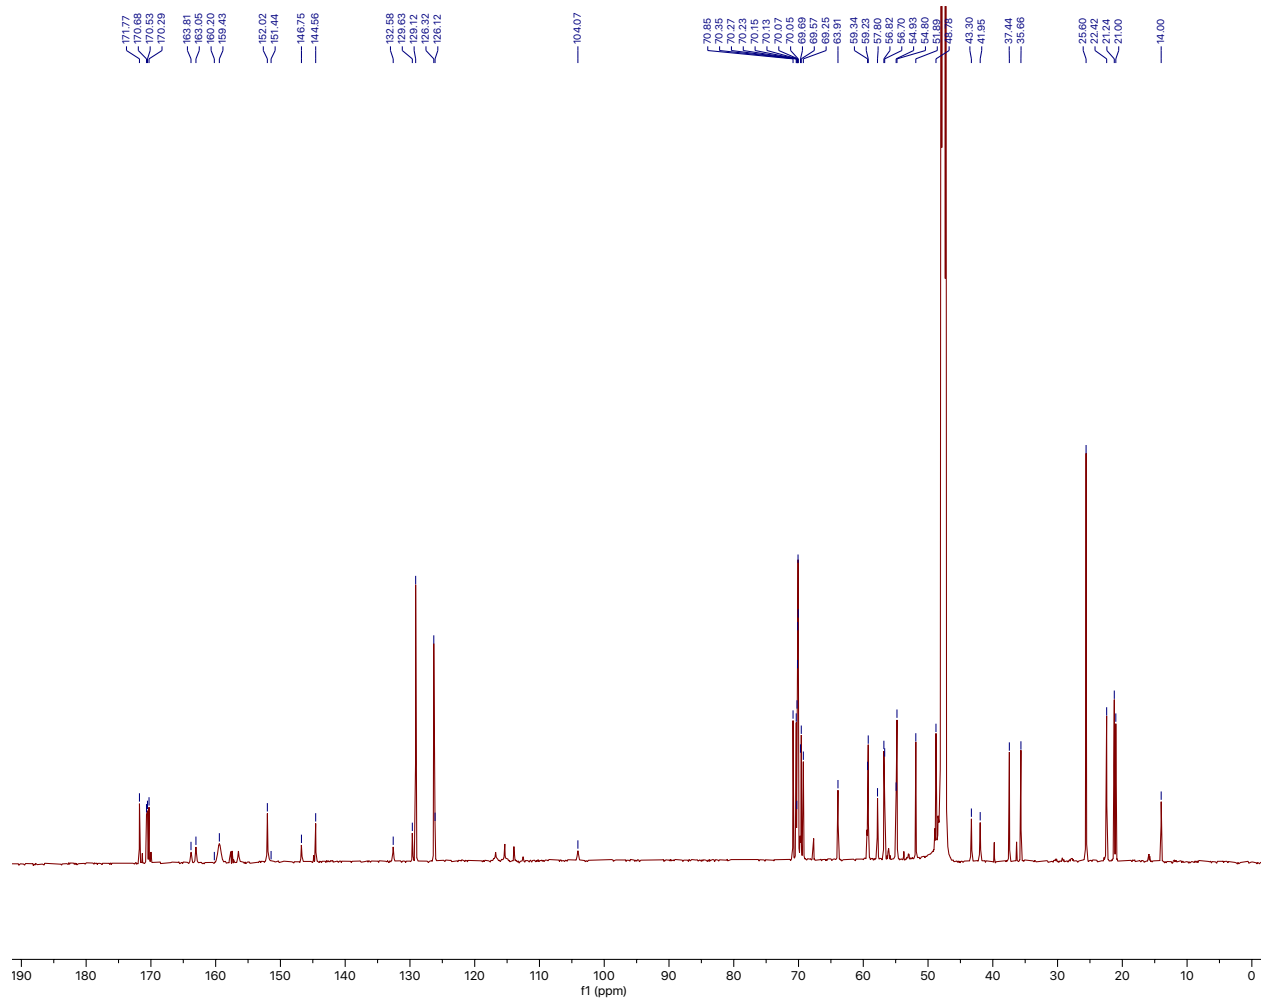

Figure S8.  $^{13}\text{C}$  NMR spectrum of compound **21**,  $\text{CD}_3\text{OD}$ .

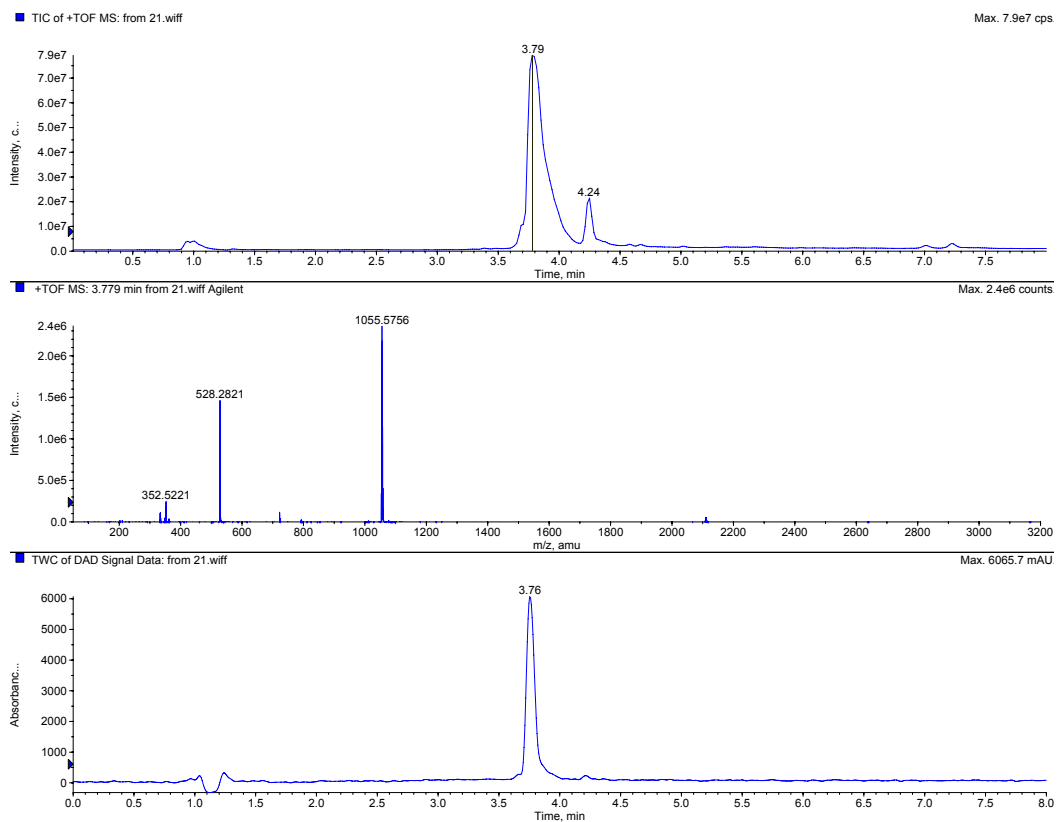

Figure S9. HPLC spectrum of compound **21**.

Table S1. Raw data of compounds **15**, **21**, **17** and EPZ015666 inhibiting the PRMT5 methyltransferase activity in the PRMT5 biochemical assay.

| FlashPlate Methyltransferase Profiling |                  | PRMT5/MEP50 Complex |                 |                 |                 |                 |                 |                  |                  |
|----------------------------------------|------------------|---------------------|-----------------|-----------------|-----------------|-----------------|-----------------|------------------|------------------|
| <b>Raw data</b>                        |                  |                     |                 |                 |                 |                 |                 |                  |                  |
|                                        | <b>Conc.(M)</b>  | <b>15</b>           | <b>15</b>       | <b>17</b>       | <b>17</b>       | <b>21</b>       | <b>21</b>       | <b>EPZ015666</b> | <b>EPZ015666</b> |
|                                        | <b>5.00E-06</b>  | 116                 | 144             | 121             | 122             | 1950            | 1891            | 124              | 152              |
|                                        | <b>1.67E-06</b>  | 168                 | 112             | 206             | 95              | 3113            | 2942            | 220              | 244              |
|                                        | <b>5.56E-07</b>  | 225                 | 271             | 231             | 271             | 3594            | 3576            | 337              | 495              |
|                                        | <b>1.85E-07</b>  | 383                 | 467             | 448             | 421             | 4301            | 4218            | 904              | 833              |
|                                        | <b>6.17E-08</b>  | 1105                | 943             | 865             | 903             | 4719            | 4132            | 1469             | 1616             |
|                                        | <b>2.06E-08</b>  | 2033                | 1883            | 1486            | 1608            | 4829            | 4665            | 2756             | 2915             |
|                                        | <b>6.86E-09</b>  | 3163                | 3061            | 2960            | 2749            | 4591            | 4785            | 3532             | 3140             |
|                                        | <b>2.29E-09</b>  | 3992                | 3925            | 3777            | 3937            | 4624            | 4888            | 4545             | 4517             |
|                                        | <b>7.62E-10</b>  | 4329                | 4462            | 4426            | 4504            | 5091            | 4640            | 4554             | 4600             |
|                                        | <b>2.54E-10</b>  | 4355                | 4332            | 4350            | 4470            | 4897            | 4792            | 4143             | 4419             |
|                                        | <b>DMSO</b>      | 4256                | 3923            | 4462            | 4498            | 4479            | 4626            | 4623             | 4776             |
| <b>%Activity</b>                       |                  |                     |                 |                 |                 |                 |                 |                  |                  |
|                                        | <b>Conc.(M)</b>  | <b>15</b>           | <b>15</b>       | <b>17</b>       | <b>17</b>       | <b>21</b>       | <b>21</b>       | <b>EPZ015666</b> | <b>EPZ015666</b> |
|                                        | <b>5.00E-06</b>  | 2.55                | 3.16            | 2.66            | 2.68            | 42.90           | 41.60           | 2.72             | 3.34             |
|                                        | <b>1.67E-06</b>  | 3.69                | 2.46            | 4.53            | 2.08            | 68.48           | 64.72           | 4.83             | 5.36             |
|                                        | <b>5.56E-07</b>  | 4.94                | 5.96            | 5.08            | 5.96            | 79.07           | 78.67           | 7.41             | 10.88            |
|                                        | <b>1.85E-07</b>  | 8.42                | 10.27           | 9.85            | 9.26            | 94.62           | 92.80           | 19.88            | 18.32            |
|                                        | <b>6.17E-08</b>  | 24.31               | 20.74           | 19.03           | 19.86           | 103.82          | 90.90           | 32.31            | 35.55            |
|                                        | <b>2.06E-08</b>  | 44.72               | 41.42           | 32.69           | 35.37           | 106.24          | 102.63          | 60.63            | 64.13            |
|                                        | <b>6.86E-09</b>  | 69.58               | 67.34           | 65.12           | 60.48           | 101.00          | 105.27          | 77.70            | 69.08            |
|                                        | <b>2.29E-09</b>  | 87.82               | 86.35           | 83.09           | 86.61           | 101.73          | 107.54          | 99.99            | 99.37            |
|                                        | <b>7.62E-10</b>  | 95.24               | 98.16           | 97.37           | 99.09           | 112.00          | 102.08          | 100.19           | 101.20           |
|                                        | <b>2.54E-10</b>  | 95.81               | 95.30           | 95.70           | 98.34           | 107.74          | 105.43          | 91.15            | 97.22            |
|                                        | <b>DMSO</b>      | 93.63               | 86.31           | 98.16           | 98.96           | 98.54           | 101.77          | 101.71           | 105.07           |
|                                        | <b>HILLSLOPE</b> | <b>-0.99</b>        | <b>-1.04</b>    | <b>-0.96</b>    | <b>-0.93</b>    | <b>-0.77</b>    | <b>-0.68</b>    | <b>-0.91</b>     | <b>-0.77</b>     |
|                                        | <b>IC50 (M)</b>  | <b>1.88E-08</b>     | <b>1.76E-08</b> | <b>1.21E-08</b> | <b>1.16E-08</b> | <b>3.18E-06</b> | <b>2.98E-06</b> | <b>3.18E-08</b>  | <b>2.83E-08</b>  |

Table S2. Raw data of compounds **15**, **21**, **17** and EPZ015666 in cell viability assays.

| <b>MCF-7 cells treated with 15, 21, 17 or EPZ015666</b> |            |            |            |                  |            |            |            |
|---------------------------------------------------------|------------|------------|------------|------------------|------------|------------|------------|
| Viability                                               |            |            |            |                  |            |            |            |
| <b>15</b>                                               |            |            |            | <b>21</b>        |            |            |            |
| 0.1                                                     | 105.3077   | 102.5247   | 105.3358   | 0.1              | 99.81698   | 94.54928   | 98.16948   |
| 0.3                                                     | 101.6677   | 106.2998   | 106.4838   | 0.3              | 89.39629   | 98.89076   | 97.29685   |
| 1                                                       | 85.34882   | 88.73061   | 84.29195   | 1                | 95.61483   | 90.29079   | 100.6339   |
| 3                                                       | 56.84664   | 56.60026   | 51.08575   | 3                | 87.3941    | 84.40584   | 90.06798   |
| 10                                                      | 58.18388   | 57.54127   | 53.61291   | 10               | 91.98856   | 88.77088   | 98.9971    |
|                                                         |            |            |            |                  |            |            |            |
| <b>17</b>                                               |            |            |            | <b>EPZ015666</b> |            |            |            |
| 0.1                                                     | 97.97854   | 94.24979   | 97.7071    | 0.1              | 103.8627   | 98.19344   | 100.0024   |
| 0.3                                                     | 120.1471   | 117.759    | 118.7336   | 0.3              | 96.15282   | 93.91667   | 96.44916   |
| 1                                                       | 107.2821   | 102.9658   | 104.964    | 1                | 94.18891   | 95.47858   | 94.44257   |
| 3                                                       | 100.6041   | 99.2952    | 102.034    | 3                | 61.49821   | 61.87478   | 60.87047   |
| 10                                                      | 76.52726   | 74.18326   | 77.28988   | 10               | 54.81862   | 50.49923   | 52.3403    |
|                                                         |            |            |            |                  |            |            |            |
| <b>HeLa cells treated with 15 or EPZ015666</b>          |            |            |            |                  |            |            |            |
| Viability                                               |            |            |            |                  |            |            |            |
| <b>EPZ015666</b>                                        |            |            |            | <b>15</b>        |            |            |            |
| 0.1                                                     | 96.816214  | 93.0627502 | 92.8846653 | 0.1              | 94.6964077 | 94.2944438 | 94.1496581 |
| 0.3                                                     | 95.0155297 | 94.6469275 | 93.8997271 | 0.3              | 86.3629676 | 89.0964654 | 91.7373441 |
| 1                                                       | 100.396497 | 102.711569 | 105.225155 | 1                | 97.30633   | 94.421143  | 96.8578848 |
| 3                                                       | 72.5700914 | 68.3261055 | 67.4301835 | 3                | 76.2240952 | 79.4630465 | 76.1345061 |
| 10                                                      | 58.4619042 | 59.2699552 | 59.1871759 | 10               | 61.5377335 | 61.5555388 | 58.6177167 |
|                                                         |            |            |            |                  |            |            |            |
| <b>A549 cells treated with 15 or EPZ015666</b>          |            |            |            |                  |            |            |            |
| Viability                                               |            |            |            |                  |            |            |            |
| <b>EPZ015666</b>                                        |            |            |            | <b>15</b>        |            |            |            |
| 0.1                                                     | 103.62602  | 96.2622638 | 98.1237621 | 0.1              | 96.3164154 | 105.372071 | 100.632464 |
| 0.3                                                     | 92.1401016 | 90.2927454 | 99.5908353 | 0.3              | 88.3634049 | 93.7588869 | 96.1283189 |
| 1                                                       | 92.3172031 | 92.8489194 | 90.9699991 | 1                | 89.4851719 | 88.7338083 | 87.1566657 |
| 3                                                       | 76.4004128 | 73.9695657 | 75.3071557 | 3                | 76.2267372 | 77.9163393 | 77.1286976 |
| 10                                                      | 64.8761976 | 63.1769948 | 63.8969935 | 10               | 66.5349925 | 67.5400241 | 69.7962396 |
|                                                         |            |            |            |                  |            |            |            |
| <b>A172 cells treated with 15 or EPZ015666</b>          |            |            |            |                  |            |            |            |
| Viability                                               |            |            |            |                  |            |            |            |
| <b>EPZ015666</b>                                        |            |            |            | <b>15</b>        |            |            |            |
| 0.1                                                     | 96.2826641 | 98.7078705 | 112.622898 | 0.1              | 96.5712757 | 104.550821 | 104.301089 |
| 0.3                                                     | 95.1304114 | 104.347687 | 88.5882668 | 0.3              | 80.1068795 | 73.5889905 | 78.7630812 |
| 1                                                       | 89.1714242 | 79.0851651 | 84.4504481 | 1                | 79.9647062 | 83.4034113 | 88.5711313 |
| 3                                                       | 82.6013681 | 88.8621611 | 79.2044812 | 3                | 71.6700219 | 60.0499253 | 60.7686492 |
| 10                                                      | 64.9747572 | 66.3505145 | 52.660909  | 10               | 52.718707  | 54.8407956 | 54.0105839 |
|                                                         |            |            |            |                  |            |            |            |
| <b>Jurkat cells treated with 15 or EPZ015666</b>        |            |            |            |                  |            |            |            |
| Viability                                               |            |            |            |                  |            |            |            |
| <b>EPZ015666</b>                                        |            |            |            | <b>15</b>        |            |            |            |
| 0.1                                                     | 100.032582 | 106.529389 | 93.4706112 | 0.1              | 95.2583287 | 101.49024  | 101.607242 |
| 0.3                                                     | 99.9348364 | 93.6986837 | 94.0831487 | 0.3              | 83.3979925 | 87.2221196 | 95.7509699 |
| 1                                                       | 80.9331422 | 74.4037534 | 81.6303923 | 1                | 83.4842047 | 70.8294846 | 65.1702691 |
| 3                                                       | 61.6121465 | 55.1544376 | 55.1088231 | 3                | 58.402611  | 53.0697703 | 48.7653181 |
| 10                                                      | 37.6124071 | 44.1743777 | 45.2560928 | 10               | 40.5012624 | 31.929306  | 40.1317815 |
